# Supplementary material
Source: PubMed Central journal article supplement (PMC11071659)
Supplement: NIHMS1979857-supplement-Supplementary_Table_1.pdf [file NIHMS1979857-supplement-Supplementary_Table_1.pdf]

**Supplementary Table 1:** 18S rRNA normalized mean and SEM copy numbers for NP (normal hNP) and NP-ddC (hNPs treated with 10 $\mu$ M ddC for 6 days). One-way ANOVA's showed P>0.05 for each gene comparison.

|               |                | <b>NES/18S</b> | <b>SOX2/18S</b> | <b>FN1/18S</b> | <b>MSI1/18S</b> |
|---------------|----------------|----------------|-----------------|----------------|-----------------|
| <b>NP</b>     | <b>Average</b> | 0.973459       | 0.564212        | 0.335274       | 0.9375          |
|               | <b>SEM</b>     | 0.138937       | 0.134039        | 0.059434       | 0.174127        |
| <b>NP-ddC</b> | <b>Average</b> | 0.881308       | 0.299929        | 0.199947       | 0.579957        |
|               | <b>SEM</b>     | 0.122047       | 0.02327         | 0.02217        | 0.034237        |
|               | <b>p-value</b> | 0.31976        | 0.071067        | 0.051547       | 0.065384        |
